# Supplementary material
Source: publisher figshare collection journal article supplement (https://acs.figshare.com/ndownloader/files/3806212)
Supplement: Supplementary file 1 [file 3806212]

# The Origin of High Mobility in Molybdenum Doped Indium Oxide

## Supplementary Information

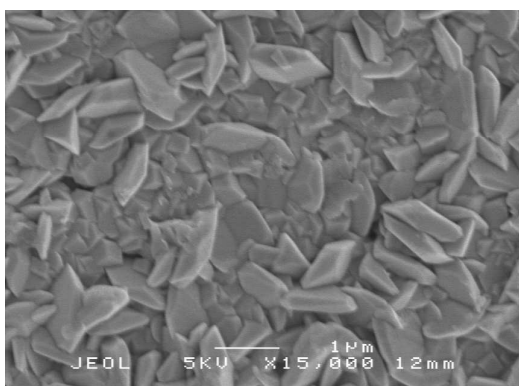

Figure 1. Top down SEM image of  $\text{Sn:In}_2\text{O}_3$  (2 mol.% Sn/In in precursor solution) thin film prepared by AACVD.

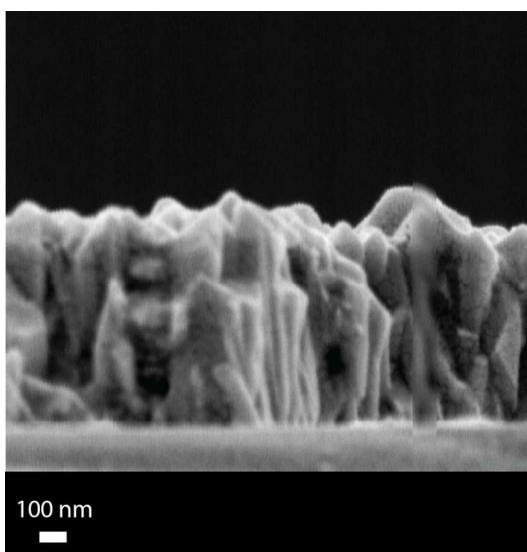

Figure 2. Side-on SEM image of  $\text{Mo:In}_2\text{O}_3$  (2 mol.% Mo/In in precursor solution) thin film prepared by AACVD.
